# Supplementary material for: Identification of the APC/C co-factor FZR1 as a novel therapeutic target for multiple myeloma
Source: PubMed Central journal article supplement (PMC5342567; doi:10.18632/oncotarget.12026), 2016-09-15
Supplement: oncotarget-07-70481-s001.pdf [file oncotarget-07-70481-s001.pdf]

# Identification of the APC/C co-factor FZR1 as a novel therapeutic target for multiple myeloma

## SUPPLEMENTARY FIGURES

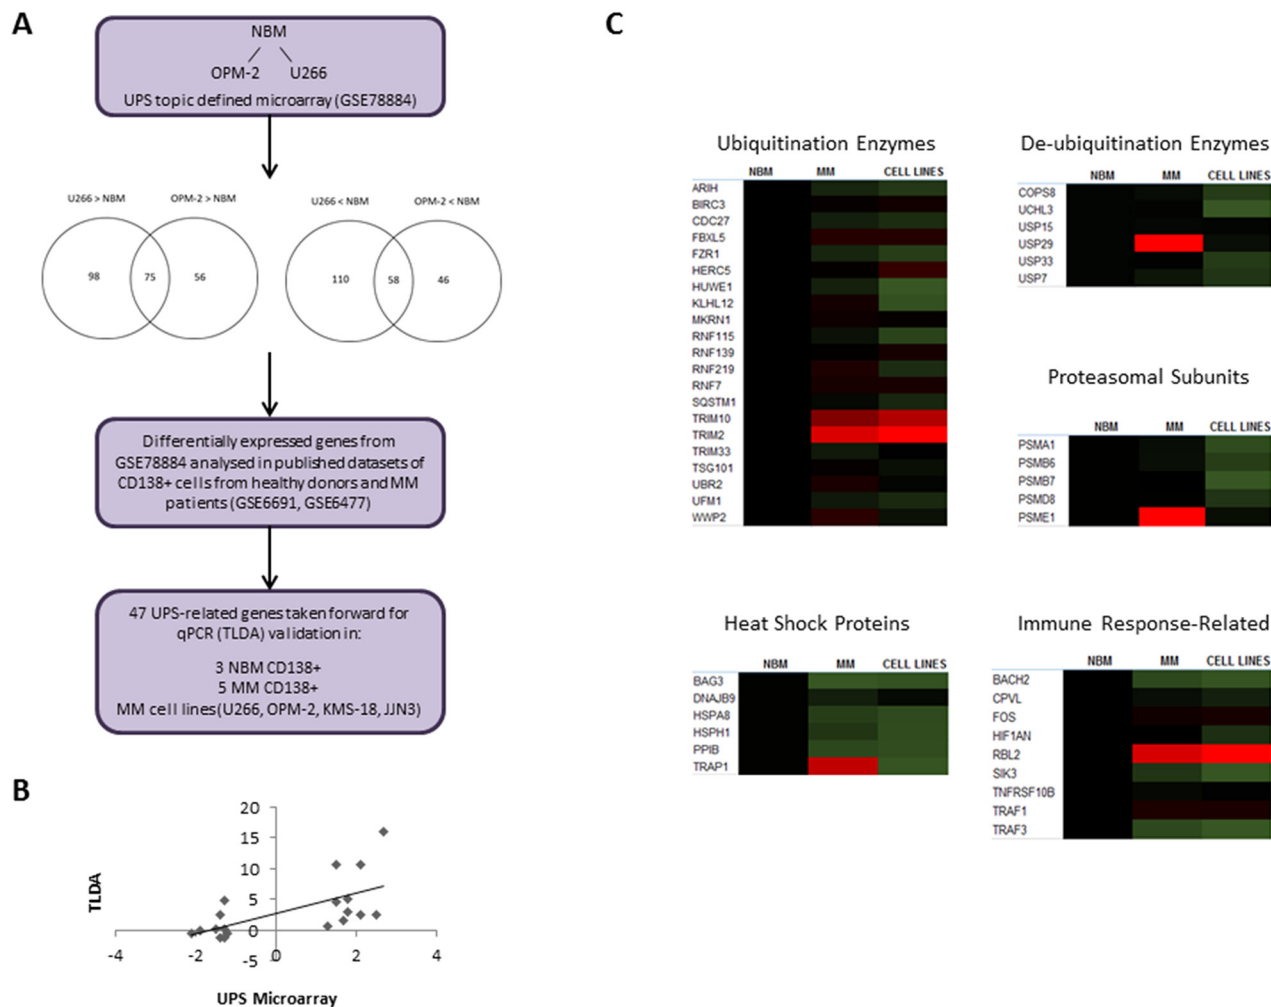

**Supplementary Figure S1:** **A.** Schematic of UPS gene signature identification. **B.** Correlation of gene expression in PIQOR microarrays and TLDA q-PCR validation. **C.** Heatmap of gene expression in CD138+ cells from MM patient samples (n=5) and MM cell lines (U266, OPM-2, KMS-18, JLN3) compared to CD138+ cells from NBM (n=3). Results are expressed as fold change relative to NBM CD138+ cells, Red < 1, Black =1, Green >1.

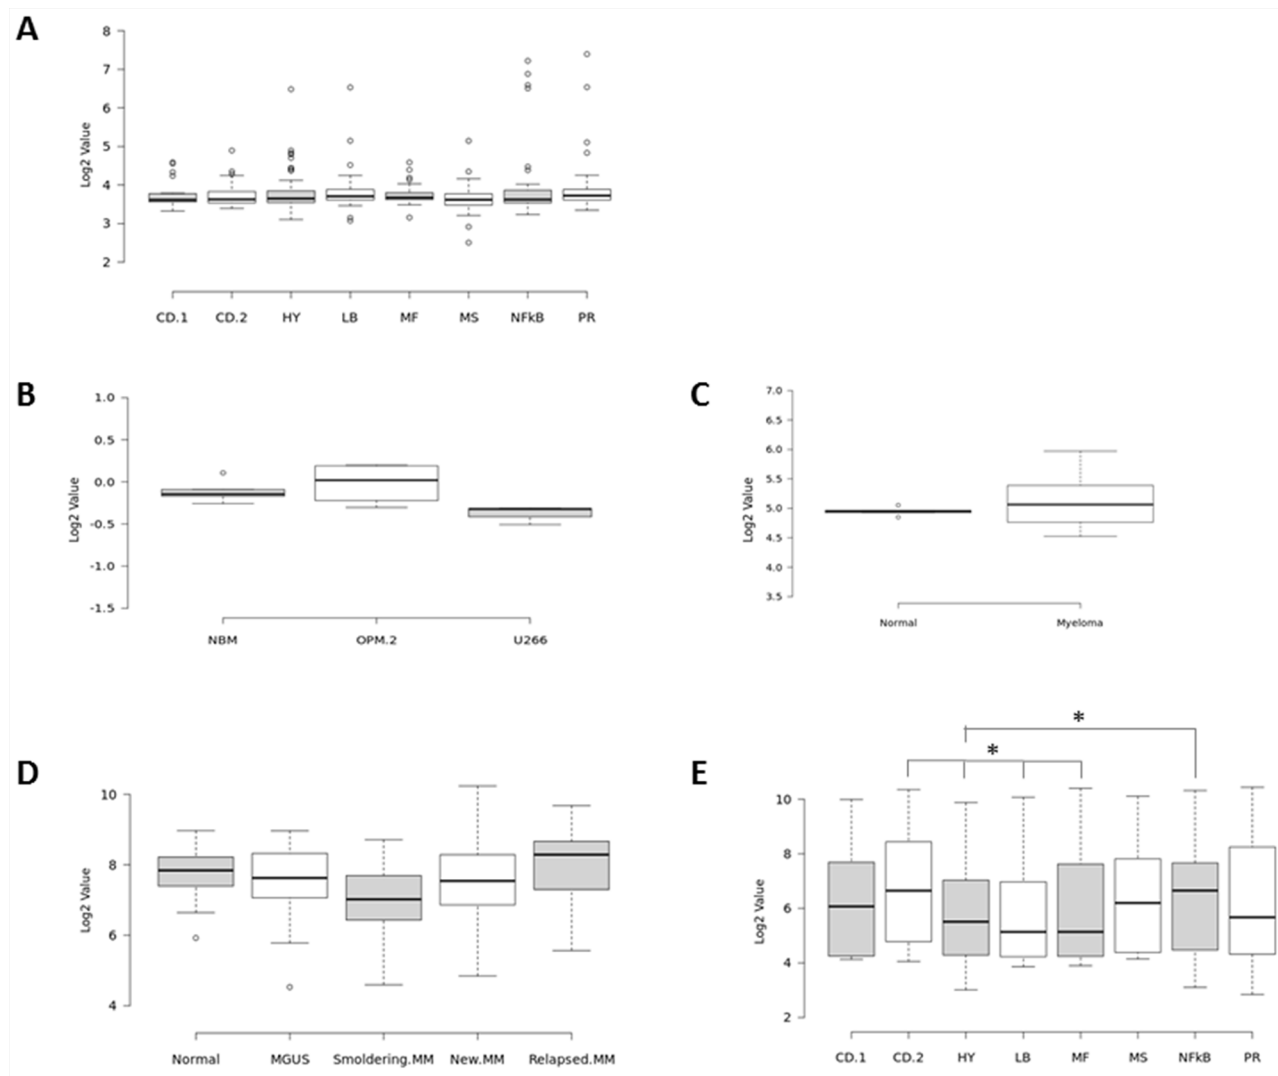

**Supplementary Figure S2:** **A.** FZR1 gene expression across molecular subgroups of MM; data from published dataset GSE19784 **B.** CDC20 gene expression in normal bone marrow (NBM), OPM-2 and U266 MM cell lines; GSE78884. **C.** CDC20 gene expression in CD138+ cells from normal donors and MM patients; data from published dataset GSE6477. **D.** CDC20 gene expression in CD138+ from normal donors, monoclonal gammopathy of undetermined significance (MGUS), smoldering MM, newly diagnosed MM and relapsed MM; data from published dataset GSE6691. **E.** CDC20 gene expression across molecular subgroups of MM; data from published dataset GSE19784. \*  $p \leq 0.05$  (t-test).

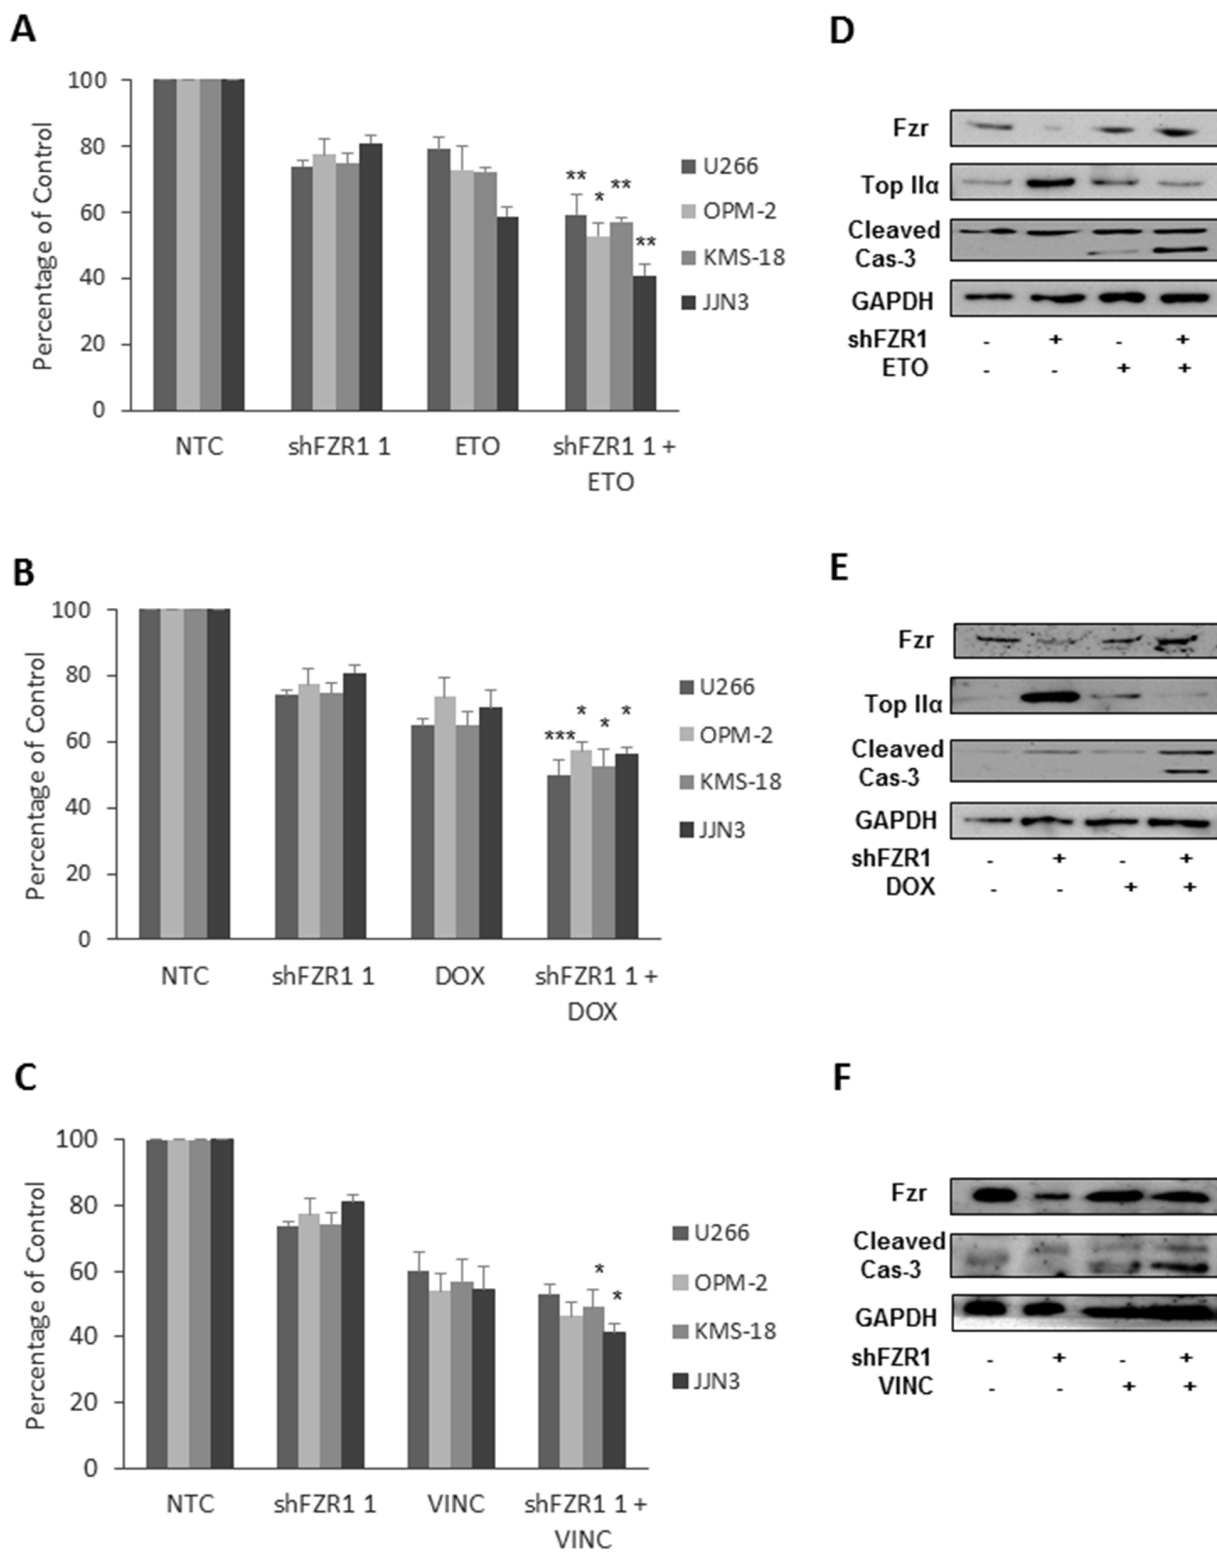

**Supplementary Figure S3: FZR1 knockdown enhances the effect of conventional anti-mitotic agents in MM cell lines.**

A-C. MM cell lines were transduced with shFZR1 1 and after puromycin selection, NTC or shFZR1 cells were treated with 1 μM etoposide (ETO), 100 nM doxorubicin (DOX), or 10 μM vincristine (VINC). Cell viability 48 hrs post-treatment; results shown are the mean of 3 independent experiments and are expressed as a percentage of vehicle treated control. D-F. Western blot analysis of Fzr knockdown, TopIIα and cleaved caspase-3 48 hrs post-treatment. \* p ≤ 0.05, \*\* p ≤ 0.01, \*\*\* p ≤ 0.001 (one-way ANOVA).

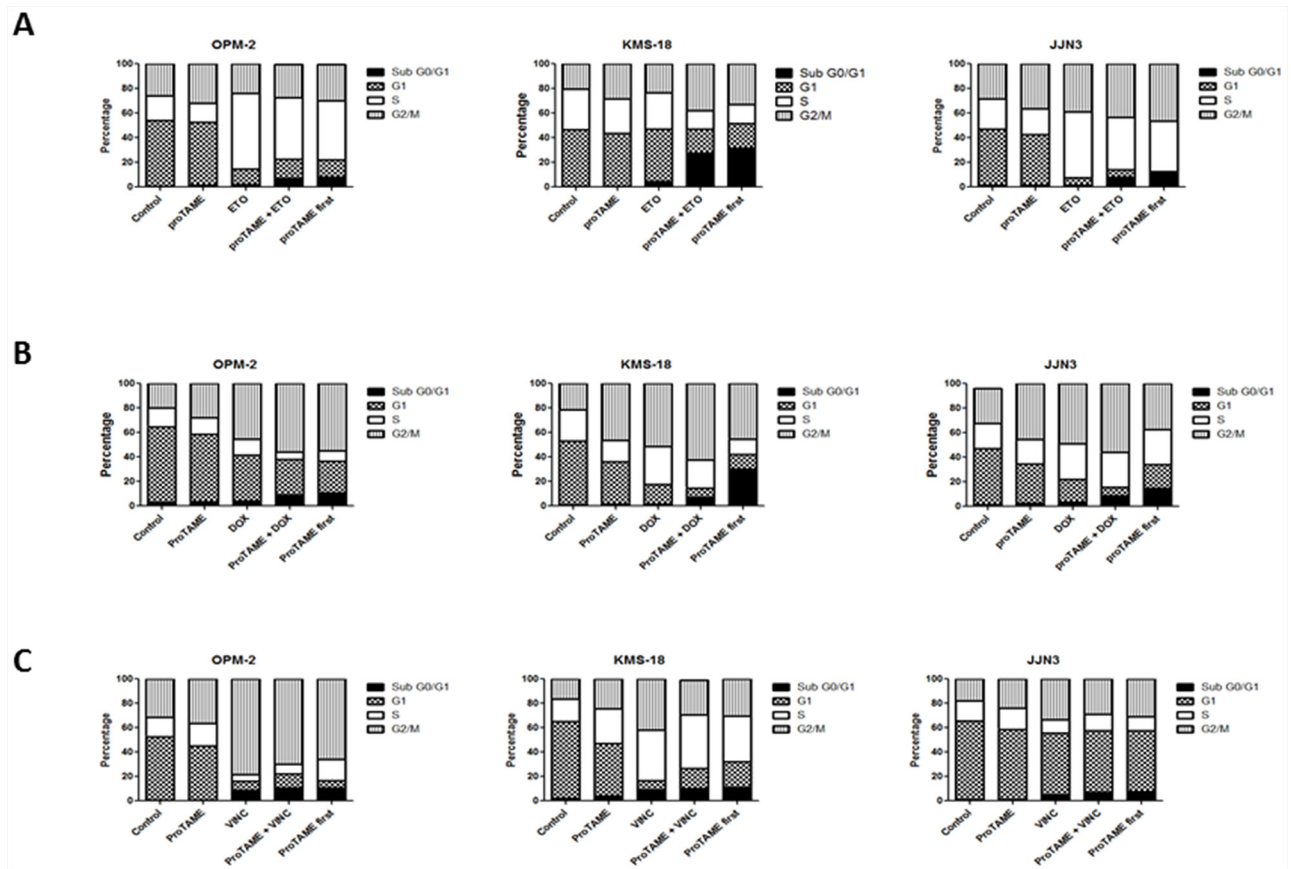

**Supplementary Figure S4:** A. Cell cycle analysis of MM cell lines treated with 10  $\mu$ M proTAME, 1  $\mu$ M etoposide (ETO) or a combination of both drugs added simultaneously or first pre-treated for 8 hrs with proTAME. B. Cell cycle analysis of MM cell lines treated with 10  $\mu$ M proTAME, 100 nM doxorubicin (DOX) or a combination of both drugs added simultaneously or first pre-treated for 8 hrs with proTAME. C. Cell cycle analysis of MM cell lines treated with 10  $\mu$ M proTAME, 10  $\mu$ M vincristine (VINC) or a combination of both drugs added simultaneously or first pre-treated for 8 hrs with proTAME. Results shown represent a mean of 3 independent experiments.

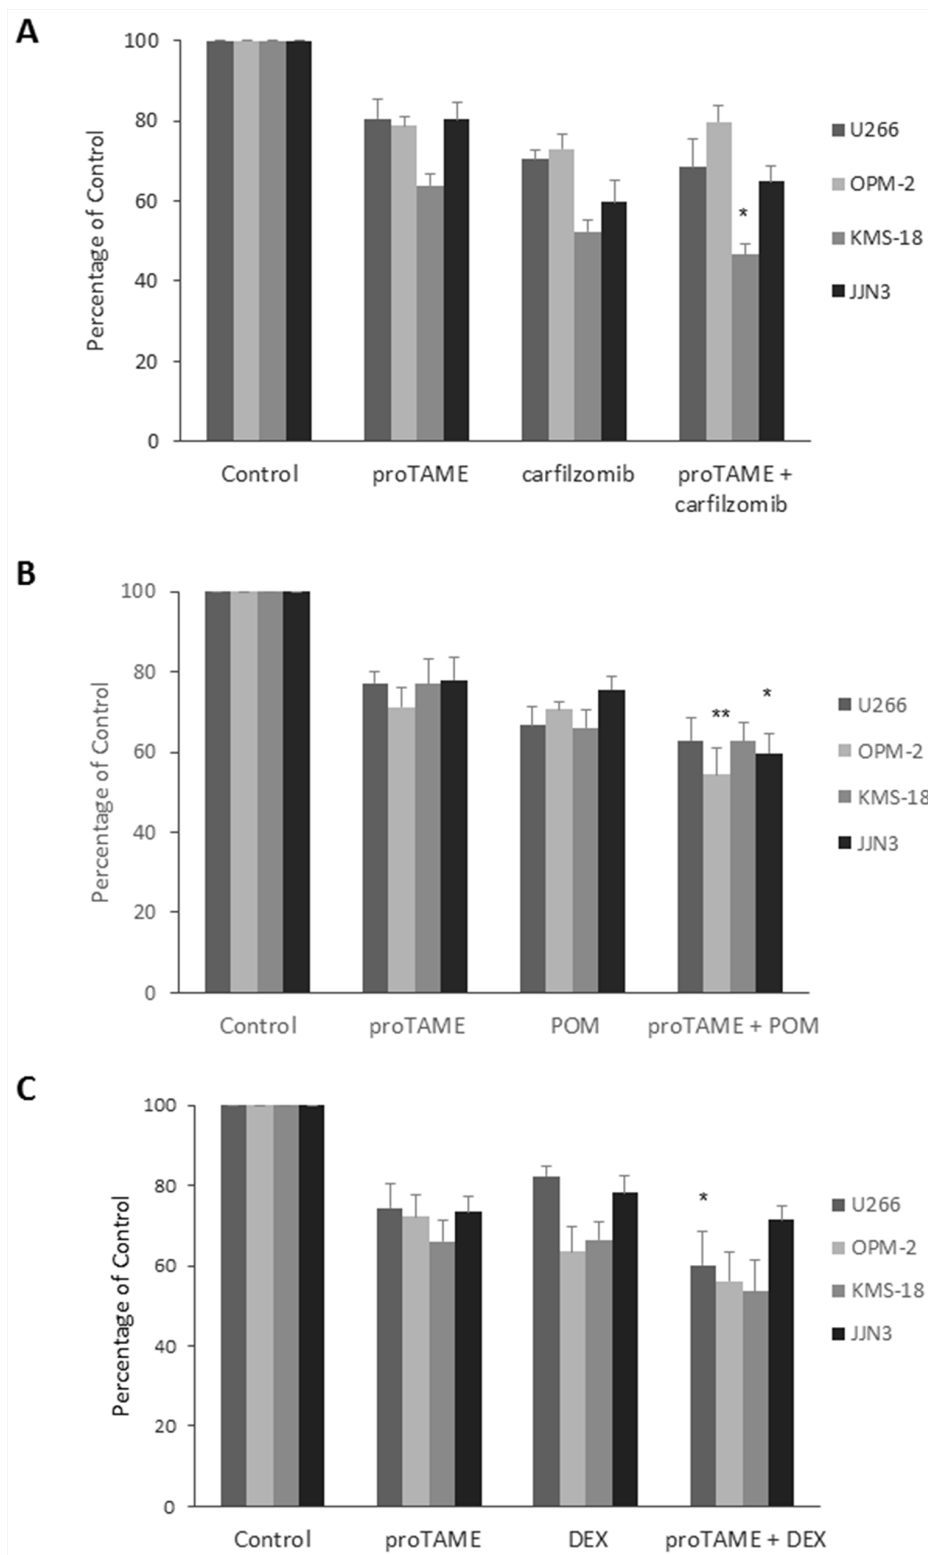

**Supplementary Figure S5:** A. MM cell lines were treated with 10  $\mu$ M proTAME, 10 nM carfilzomib or a combination of both drugs added simultaneously. B. MM cell lines were treated with 10  $\mu$ M proTAME, 20  $\mu$ M pomalidomide, or a combination of both drugs added simultaneously. C. MM cell lines were treated with 10  $\mu$ M proTAME, 20 nM dexamethasone, or a combination of both drugs added simultaneously. Cell viability 48 hrs post-treatment; results shown are the mean of 3 independent experiments and are expressed as a percentage of vehicle treated control. \*  $p \leq 0.05$ , \*\*  $p \leq 0.01$  (one-way ANOVA).
